# Supplementary material for: Functional gene delivery to and across brain vasculature of systemic AAVs with endothelial-specific tropism in rodents and broad tropism in primates
Source: PubMed Central journal article supplement (PMC10250345; doi:10.1038/s41467-023-38582-7), 2023-06-08
Supplement: 41467_2023_38582_MOESM3_ESM.pdf [file 41467_2023_38582_MOESM3_ESM.pdf]

### Description of Additional Supplementary Files

File Name: Supplementary Movie 1

Description: **Macaque hindbrain injected with AAV9 and AAV9-X1.1.**

AAV9 packaging ssAAV:CAG-eGFP and AAV9-X1.1 packaging ssAAV:CAG-tdTomato were mixed and intravenously injected at a dose of  $5 \times 10^{13}$  vg/kg per macaque (Macaca mulatta, injected within 10 days of birth, female, i.e.  $2.5 \times 10^{13}$  vg/kg per AAV). Representative overview of macaque hindbrain.
