# Supplementary material for: Functional gene delivery to and across brain vasculature of systemic AAVs with endothelial-specific tropism in rodents and broad tropism in primates
Source: PubMed Central journal article supplement (PMC10250345; doi:10.1038/s41467-023-38582-7), 2023-06-08
Supplement: 41467_2023_38582_MOESM5_ESM.pdf [file 41467_2023_38582_MOESM5_ESM.pdf]

## Reporting Summary

Nature Portfolio wishes to improve the reproducibility of the work that we publish. This form provides structure for consistency and transparency in reporting. For further information on Nature Portfolio policies, see our [Editorial Policies](#) and the [Editorial Policy Checklist](#).

### Statistics

For all statistical analyses, confirm that the following items are present in the figure legend, table legend, main text, or Methods section.

n/a Confirmed

- |                                     |                                     |                                                                                                                                                                                                                                                            |
|-------------------------------------|-------------------------------------|------------------------------------------------------------------------------------------------------------------------------------------------------------------------------------------------------------------------------------------------------------|
| <input type="checkbox"/>            | <input checked="" type="checkbox"/> | The exact sample size ( $n$ ) for each experimental group/condition, given as a discrete number and unit of measurement                                                                                                                                    |
| <input type="checkbox"/>            | <input checked="" type="checkbox"/> | A statement on whether measurements were taken from distinct samples or whether the same sample was measured repeatedly                                                                                                                                    |
| <input type="checkbox"/>            | <input checked="" type="checkbox"/> | The statistical test(s) used AND whether they are one- or two-sided<br><i>Only common tests should be described solely by name; describe more complex techniques in the Methods section.</i>                                                               |
| <input checked="" type="checkbox"/> | <input type="checkbox"/>            | A description of all covariates tested                                                                                                                                                                                                                     |
| <input checked="" type="checkbox"/> | <input type="checkbox"/>            | A description of any assumptions or corrections, such as tests of normality and adjustment for multiple comparisons                                                                                                                                        |
| <input type="checkbox"/>            | <input checked="" type="checkbox"/> | A full description of the statistical parameters including central tendency (e.g. means) or other basic estimates (e.g. regression coefficient) AND variation (e.g. standard deviation) or associated estimates of uncertainty (e.g. confidence intervals) |
| <input type="checkbox"/>            | <input checked="" type="checkbox"/> | For null hypothesis testing, the test statistic (e.g. $F$ , $t$ , $r$ ) with confidence intervals, effect sizes, degrees of freedom and $P$ value noted<br><i>Give <math>P</math> values as exact values whenever suitable.</i>                            |
| <input checked="" type="checkbox"/> | <input type="checkbox"/>            | For Bayesian analysis, information on the choice of priors and Markov chain Monte Carlo settings                                                                                                                                                           |
| <input checked="" type="checkbox"/> | <input type="checkbox"/>            | For hierarchical and complex designs, identification of the appropriate level for tests and full reporting of outcomes                                                                                                                                     |
| <input checked="" type="checkbox"/> | <input type="checkbox"/>            | Estimates of effect sizes (e.g. Cohen's $d$ , Pearson's $r$ ), indicating how they were calculated                                                                                                                                                         |

*Our web collection on [statistics for biologists](#) contains articles on many of the points above.*

### Software and code

Policy information about [availability of computer code](#)

- |                 |                                                                                                                                                                                                                                            |
|-----------------|--------------------------------------------------------------------------------------------------------------------------------------------------------------------------------------------------------------------------------------------|
| Data collection | For images acquiring and processing, we used Zen Black 2.3 SP1, BZ-X Analyzer 1.4.0.1 and Imaris 9 software.                                                                                                                               |
| Data analysis   | Statistical analysis was performed with Graph-Pad Prism 9.0.1 software. The codes used for M-CREATE data analysis are available on GitHub: <a href="https://github.com/GradinaruLab/mCREATE">https://github.com/GradinaruLab/mCREATE</a> . |

For manuscripts utilizing custom algorithms or software that are central to the research but not yet described in published literature, software must be made available to editors and reviewers. We strongly encourage code deposition in a community repository (e.g. GitHub). See the Nature Portfolio [guidelines for submitting code & software](#) for further information.

### Data

Policy information about [availability of data](#)

All manuscripts must include a [data availability statement](#). This statement should provide the following information, where applicable:

- Accession codes, unique identifiers, or web links for publicly available datasets
- A description of any restrictions on data availability
- For clinical datasets or third party data, please ensure that the statement adheres to our [policy](#)

All sequences of AAV variants developed in this study are provided in materials and methods. Key vector plasmid AAV-X1.1 is available at Addgene (#196836). All other constructs and tools will be available through the Beckman Institute CLOVER Center (<https://clover.caltech.edu/>). Source data are provided with this paper. Other data that support the findings of this study are available from the corresponding author upon request.

## Human research participants

Policy information about [studies involving human research participants and Sex and Gender in Research](#).

### Reporting on sex and gender

Recruitment of the patients is performed outside of the supervision of the Allen Institute by a hospital-appointed case coordinator under the authority of the IRB of the participating hospital. Brain tissue were collected based on availability, both female and male tissue were used in this study.

### Population characteristics

Human brain tissue came from peri-tumor tissue removed from the right parietal cortex of a 55-year-old female patient and the right frontal cortex of a 61-year-old male patient to access deep brain tumors.

### Recruitment

Recruitment of the patients is performed outside of the supervision of the Allen Institute by a hospital-appointed case coordinator under the authority of the IRB of the participating hospital.

### Ethics oversight

All human neurosurgical tissue studies were approved by the Western Institutional Review Board. Human neurosurgical specimens were obtained with informed consent of patients that underwent neocortex resection for the treatment of temporal lobe epilepsy or for tumor removal. Specimens for research were not required for diagnostic purposes and were distal to the pathological focus of the surgical resections.

Note that full information on the approval of the study protocol must also be provided in the manuscript.

## Field-specific reporting

Please select the one below that is the best fit for your research. If you are not sure, read the appropriate sections before making your selection.

Life sciences  Behavioural & social sciences  Ecological, evolutionary & environmental sciences

For a reference copy of the document with all sections, see [nature.com/documents/nr-reporting-summary-flat.pdf](https://nature.com/documents/nr-reporting-summary-flat.pdf)

## Life sciences study design

All studies must disclose on these points even when the disclosure is negative.

### Sample size

No sample size calculation was performed.

### Data exclusions

No data were excluded from the analysis.

### Replication

Each in vitro experiment were evaluated in multiple repeats and showed similar result. Each animal experiment used two or more animals except the macaque experiment. We observed good correlation between the 2 independent macaque experiment we performed. We also observed similar results between repeats of other animal experiment.

### Randomization

Samples or animals were randomly allocated into experimental group. For imaging we randomly selected the fields-of-views in the specific regions of the brain.

### Blinding

The investigators were not blinded to allocation during experiments. For outcome assessment such as image collection and analysis, we used a barcode for each condition and matched them after analysis.

## Reporting for specific materials, systems and methods

We require information from authors about some types of materials, experimental systems and methods used in many studies. Here, indicate whether each material, system or method listed is relevant to your study. If you are not sure if a list item applies to your research, read the appropriate section before selecting a response.

### Materials & experimental systems

| n/a                                 | Involved in the study                                           |
|-------------------------------------|-----------------------------------------------------------------|
| <input type="checkbox"/>            | <input checked="" type="checkbox"/> Antibodies                  |
| <input type="checkbox"/>            | <input checked="" type="checkbox"/> Eukaryotic cell lines       |
| <input checked="" type="checkbox"/> | <input type="checkbox"/> Palaeontology and archaeology          |
| <input type="checkbox"/>            | <input checked="" type="checkbox"/> Animals and other organisms |
| <input checked="" type="checkbox"/> | <input type="checkbox"/> Clinical data                          |
| <input checked="" type="checkbox"/> | <input type="checkbox"/> Dual use research of concern           |

### Methods

| n/a                                 | Involved in the study                           |
|-------------------------------------|-------------------------------------------------|
| <input checked="" type="checkbox"/> | <input type="checkbox"/> ChIP-seq               |
| <input checked="" type="checkbox"/> | <input type="checkbox"/> Flow cytometry         |
| <input checked="" type="checkbox"/> | <input type="checkbox"/> MRI-based neuroimaging |

## Antibodies used

Anti-CD31 from Histoviva ,Cat # DIA-310, diluted 1:100  
 Anti-podocalyxin from R&D Systems, Cat # AF1556, diluted 1:100  
 Anti-CD13 from AbD Serotec, Cat # MCA2183EL, diluted 1:100  
 Anti-CNN-1 (Calponin 1) from Abcam, Cat # Ab46794, diluted 1:100  
 Anti-Collagen-IV, from AbD Serotec, Cat # 2150-1470, diluted 1:300  
 Anti-GFAP from Invitrogen, Cat # 13-0300, diluted 1:600  
 Anti-HA from Roche, Cat# 11867423001, diluted 1:200  
 Anti-GFP from Aves Labs, Cat# GFP-1020, diluted 1:500  
 Anti-GLUT1 from Millipore, Cat# 07-1401, diluted: 1:500  
 Anti-S100 $\beta$  from Abcam, Cat# ab52642, diluted: 1:500,  
 Anti-NeuN from Abcam, Cat# ab177487, diluted: 1:500  
 Anti-Vglut2 from Synaptic System, Cat# 135 404, diluted: 1:500  
 Anti-PSD95 from Thermo Fisher, Cat# 51-6900, diluted: 1:500  
 Anti-HA from Biologend, Cat# 901513, diluted: 1:1000  
 Anti-NeuN from Millipore, Cat# ABN78, diluted: 1:1000  
 Anti-Olig2 from Abcam, Cat# AB9610, diluted 1:1000  
 Anti-S100 $\beta$  from Millipore, Cat# S2532, diluted 1:1000  
 Anti-mouse Alexa488 from Invitrogen, Cat# A-11001, diluted 1:1000  
 Anti-mouse Alexa555 from Invitrogen, Cat# A-21422, diluted 1:1000  
 Anti-rabbit Alexa555 from Invitrogen, Cat# A-21428, diluted 1:1000  
 Anti-rabbit Alexa647 from Invitrogen, Cat# A-21245, diluted 1:1000  
 Anti-rat Alexa488 from Invitrogen, Cat# A-11006, diluted 1:1000  
 Anti-rat Alexa555 from Invitrogen, Cat# A-21434, diluted 1:1000  
 Anti-rabbit AF594 from Jackson Immuno, Cat# 711-585-152, diluted 1:1000

## Validation

Anti-CD31 from Histoviva ,Cat # DIA-310 (<https://www.dianova.com/en/shop/dia-310-anti-cd31-mssw-from-rat-sz31-unconj-for-mouse-ffpe-tissue/>)  
 Anti-podocalyxin from R&D Systems, Cat # AF1556 ([https://www.rndsystems.com/products/mouse-podocalyxin-antibody\\_af1556](https://www.rndsystems.com/products/mouse-podocalyxin-antibody_af1556))  
 Anti-CD13 from AbD Serotec, Cat # MCA2183EL (<https://www.bio-rad-antibodies.com/monoclonal/mouse-cd13-antibody-r3-63-mca2183.html?f=purified>)  
 Anti-CNN-1 (Calponin 1) from Abcam, Cat # Ab46794 (<https://www.abcam.com/products/primary-antibodies/calponin-1-antibody-ep798y-ab46794.html>)  
 Anti-Collagen-IV, from AbD Serotec, Cat # 2150-1470 (<https://www.bio-rad-antibodies.com/polyclonal/mouse-collagen-iv-antibody-2150-1470.html?f=purified>)  
 Anti-GFAP from Invitrogen, Cat # 13-0300 (<https://www.thermofisher.com/antibody/product/GFAP-Antibody-clone-2-2B10-Monoclonal/13-0300>)  
 Anti-HA from Roche, Cat# 11867423001 (<https://www.sigmaaldrich.com/US/en/product/roche/roahaha>)  
 Anti-GFP from Aves Labs, Cat# GFP-1020 (<https://www.aveslabs.com/products/anti-green-fluorescent-protein-antibody-gfp>)  
 Anti-GLUT1 from Millipore, Cat# 07-1401 ([https://www.emdmillipore.com/US/en/product/Anti-GLUT-1-Antibody-CT,MM\\_NF-07-1401?ReferrerURL=https%3A%2F%2Fwww.google.com%2F](https://www.emdmillipore.com/US/en/product/Anti-GLUT-1-Antibody-CT,MM_NF-07-1401?ReferrerURL=https%3A%2F%2Fwww.google.com%2F))  
 Anti-S100 $\beta$  from Abcam, Cat# ab52642 (<https://www.abcam.com/products/primary-antibodies/s100-beta-antibody-ep1576y-astrocyte-marker-ab52642.html>)  
 Anti-NeuN from Abcam, Cat# ab177487 (<https://www.abcam.com/products/primary-antibodies/neun-antibody-epr12763-neuronal-marker-ab177487.html>)  
 Anti-Vglut2 from Synaptic System, Cat# 135 404 (<https://sysy.com/product/135404>)  
 Anti-PSD95 from Thermo Fisher, Cat# 51-6900 (<https://www.thermofisher.com/antibody/product/PSD-95-Antibody-Polyclonal/51-6900>)  
 Anti-HA from Biologend, Cat# 901513 (<https://www.biologend.com/en-us/products/anti-ha-11-epitope-tag-antibody-11071?GroupID=GROUP26>)  
 Anti-NeuN from Millipore, Cat# ABN78 ([https://www.emdmillipore.com/US/en/product/Anti-NeuN-Antibody-rabbit,MM\\_NF-ABN78](https://www.emdmillipore.com/US/en/product/Anti-NeuN-Antibody-rabbit,MM_NF-ABN78))  
 Anti-Olig2 from Abcam, Cat# AB9610 ([https://www.emdmillipore.com/US/en/product/Anti-Olig-2-Antibody,MM\\_NF-AB9610](https://www.emdmillipore.com/US/en/product/Anti-Olig-2-Antibody,MM_NF-AB9610))  
 Anti-S100 $\beta$  from Millipore, Cat# S2532 (<https://www.sigmaaldrich.com/US/en/product/sigma/s2532>)  
 Anti-mouse Alexa488 from Invitrogen, Cat# A-11001 (<https://www.thermofisher.com/antibody/product/Goat-anti-Mouse-IgG-H-L-Cross-Adsorbed-Secondary-Antibody-Polyclonal/A-11001>)  
 Anti-mouse Alexa555 from Invitrogen, Cat# A-21422 (<https://www.thermofisher.com/antibody/product/Goat-anti-Mouse-IgG-H-L-Cross-Adsorbed-Secondary-Antibody-Polyclonal/A-21422>)  
 Anti-rabbit Alexa555 from Invitrogen, Cat# A-21428 (<https://www.thermofisher.com/antibody/product/Goat-anti-Rabbit-IgG-H-L-Cross-Adsorbed-Secondary-Antibody-Polyclonal/A-21428>)  
 Anti-rabbit Alexa647 from Invitrogen, Cat# A-21245 (<https://www.thermofisher.com/antibody/product/Goat-anti-Rabbit-IgG-H-L-Highly-Cross-Adsorbed-Secondary-Antibody-Polyclonal/A-21245>)  
 Anti-rat Alexa488 from Invitrogen, Cat# A-11006 (<https://www.thermofisher.com/antibody/product/Goat-anti-Rat-IgG-H-L-Cross-Adsorbed-Secondary-Antibody-Polyclonal/A-11006>)  
 Anti-rat Alexa555 from Invitrogen, Cat# A-21434 (<https://www.thermofisher.com/antibody/product/Goat-anti-Rat-IgG-H-L-Cross-Adsorbed-Secondary-Antibody-Polyclonal/A-21434>)  
 Anti-rabbit AF594 from Jackson Immuno, Cat# 711-585-152 (<https://www.jacksonimmuno.com/catalog/products/711-585-152>)

## Eukaryotic cell lines

Policy information about [cell lines and Sex and Gender in Research](#)

|                                                                      |                                                                                                                                                                                                                                                                      |
|----------------------------------------------------------------------|----------------------------------------------------------------------------------------------------------------------------------------------------------------------------------------------------------------------------------------------------------------------|
| Cell line source(s)                                                  | HEK293T cells (ATCC, CRL-3216)<br>HeLa cells (ATCC, CCL-2)<br>U87 cells (ATCC, HTB-14)<br>IMR32 cells (ATCC, CCL-127)<br>Human brain microvascular endothelial cells (ScienCell Research Laboratories, cat. no. 1000)<br>Expi293F cells (Thermo Fisher, Cat# A14527) |
| Authentication                                                       | None of the cell lines used were authenticated.                                                                                                                                                                                                                      |
| Mycoplasma contamination                                             | The cell lines were not tested for mycoplasma contamination.                                                                                                                                                                                                         |
| Commonly misidentified lines<br>(See <a href="#">ICLAC</a> register) | No cell lines used in this studies are commonly misidentified.                                                                                                                                                                                                       |

## Animals and other research organisms

Policy information about [studies involving animals](#); [ARRIVE guidelines](#) recommended for reporting animal research, and [Sex and Gender in Research](#)

|                         |                                                                                                                                                                                                                                                                                                                                                                                                                                                                                                                                                                                                                                                                                                                                                                                                                                                                                                                                                                                                                                                                                                                                                                                                                                                                                                                                                                  |
|-------------------------|------------------------------------------------------------------------------------------------------------------------------------------------------------------------------------------------------------------------------------------------------------------------------------------------------------------------------------------------------------------------------------------------------------------------------------------------------------------------------------------------------------------------------------------------------------------------------------------------------------------------------------------------------------------------------------------------------------------------------------------------------------------------------------------------------------------------------------------------------------------------------------------------------------------------------------------------------------------------------------------------------------------------------------------------------------------------------------------------------------------------------------------------------------------------------------------------------------------------------------------------------------------------------------------------------------------------------------------------------------------|
| Laboratory animals      | For mice studies, we purchased C57BL/6J (000664), BALB/cJ (000651), FVB/NJ (001800), CBA/J (000656) and Tek-Cre (008863) mice (both male and females, 6-8 weeks or 2 years old) from the Jackson laboratory. 4-month-old male Hevin KO mice (Kucukdereli et al. 2011) were injected at Duke University. 4-5-month-old female Pdgfb ret/ret mice (Lindblom et al. 2003) were injected at University of Zurich. For the rat experiment, female rats were injected at UCL. For marmoset experiment, 16-month-old marmosets (1 female and 1 male) were used at UCSD. For macaque experiment, 1 female infant macaque and 1 male infant macaque were used, both were injected within 10 days of birth.                                                                                                                                                                                                                                                                                                                                                                                                                                                                                                                                                                                                                                                                |
| Wild animals            | The study did not involve wild animals.                                                                                                                                                                                                                                                                                                                                                                                                                                                                                                                                                                                                                                                                                                                                                                                                                                                                                                                                                                                                                                                                                                                                                                                                                                                                                                                          |
| Reporting on sex        | Both sexes were used across the whole study and the sex information was indicated in the detailed descriptions for each experiments. No obvious sex difference were observed in our side by side experiments with both sexes as shown in Supplementary Figure 3B.                                                                                                                                                                                                                                                                                                                                                                                                                                                                                                                                                                                                                                                                                                                                                                                                                                                                                                                                                                                                                                                                                                |
| Field-collected samples | The study did not involve field-collected samples.                                                                                                                                                                                                                                                                                                                                                                                                                                                                                                                                                                                                                                                                                                                                                                                                                                                                                                                                                                                                                                                                                                                                                                                                                                                                                                               |
| Ethics oversight        | All animal procedures in mice that were carried out in this study were approved by the California Institute of Technology Institutional Animal Care and Use Committee (IACUC), Caltech Office of Laboratory Animal Resources (OLAR), Cantonal Veterinary Office Zurich (license number ZH194/2020, 32869/2020), Duke Division of Laboratory Animal Resources (DLAR).<br>All experimental procedures in rats were conducted at UCL according to the UK Animals Scientific Procedures Act (1986) and under personal and project licenses granted by the Home Office following appropriate ethics review.<br>All experimental procedures performed on marmosets were approved by the University of California, San Diego, Institutional Animal Care and Use Committee (IACUC) and in accordance with National Institutes of Health and the American Veterinary Medical Association guidelines. Two female animals and one male animal were used in this study and received intravenous injections of AAVs.<br>All experimental procedures performed on rhesus macaques were approved by the International Animal Care and Use Committee at the University of California, Davis and the California National Primate Research Center (CNPRC). One infant female animal and one infant male animal was used in this study and received intravenous injections of AAVs. |

Note that full information on the approval of the study protocol must also be provided in the manuscript.
